# Supplementary material
Source: PubMed Central journal article supplement (PMC5210232)
Supplement: 2016.152074.EVERS_SUPPL.pdf [file 2016.152074.EVERS_SUPPL.pdf]

## Treatments for hematologic malignancies in contrast to those for solid cancers are associated with reduced red cell alloimmunization

Dorothea Evers,<sup>1,2</sup> Jaap Jan Zwaginga,<sup>\*1,2</sup> Janneke Tijmensen,<sup>1,2</sup> Rutger A. Middelburg,<sup>1,3</sup> Masja de Haas,<sup>1,2,4</sup> Karen M.K. de Vooght,<sup>5</sup> Daan van de Kerkhof,<sup>6</sup> Otto Visser,<sup>7</sup> Nathalie C.V. Péquériaux,<sup>8</sup> Francisca Hudig<sup>9</sup> and Johanna G. van der Bom<sup>\*1,3</sup>

<sup>1</sup>Center for Clinical Transfusion Research, Sanquin Research, Leiden; <sup>2</sup>Department of Immuno-hematology and Blood Transfusion, Leiden University Medical Center; <sup>3</sup>Department of Clinical Epidemiology, Leiden University Medical Center; <sup>4</sup>Department of Immunohematology Diagnostics, Sanquin, Amsterdam; <sup>5</sup>Department of Clinical Chemistry and Hematology, University Medical Center, Utrecht; <sup>6</sup>Department of Clinical Chemistry and Hematology, Catharina Hospital, Eindhoven; <sup>7</sup>Department of Hematology, VU Medical Center, Amsterdam; <sup>8</sup>Department of Clinical Chemistry and Hematology, Jeroen Bosch Hospital, 's-Hertogenbosch and <sup>9</sup>LabWest, Haga Teaching Hospital, The Hague, the Netherlands

*\*JJZ and JGB contributed equally to this work.*

©2017 Ferrata Storti Foundation. This is an open-access paper. doi:10.3324/haematol.2016.152074

Received: July 4, 2016.

Accepted: September 9, 2016.

Pre-published: September 15, 2016.

Correspondence: j.g.vanderbom@lumc.nl

---

## Methods

### Study period

The study period varied per hospital according to the electronic availability of necessary data: January 1, 2005 to December 31, 2010 at Leiden University Medical Center (Leiden), September 6, 2006 to December 31, 2013 at University Medical Center Utrecht (Utrecht), November 19, 2011 to December 31, 2013 at VU University Medical Center (Amsterdam), May 1, 2007 to April 30, 2013 at Catharina Hospital (Eindhoven), July 1, 2005 to December 31, 2013 at Jeroen Bosch Hospital ('s Hertogenbosch), and October 5, 2008 to December 31, 2013 at Haga Teaching Hospital (The Hague).

### Eligibility criteria

Eligible patients received their first red cell transfusion within the study period in one of the six participating hospitals, provided the availability of at least one (negative) pre-, and one post-transfusion antibody screen.

For all identified cases, transfusion-induced alloimmunization was verified by the donors' and the patient's phenotypes. This in addition enabled us to discriminate allo- from autoimmunisation.

Alloimmunized patients lacking exposure to a (documented or assumed) antigen-positive red cell unit were excluded. To prevent inclusion of boosting events, alloimmunizations detected within seven days of a first mismatched transfusion were excluded. By consulting the nationwide alloimmunization registry (TRIX),<sup>1</sup> we additionally excluded patients who were previously diagnosed with alloimmunization in other hospitals. Finally, hemoglobinopathy patients and infants below six months of age were not included. Although we were not informed on previous pregnancies in females, our study design sets out to minimize earlier pregnancy-induced alloimmunization as much as possible, as was recently discussed.<sup>2</sup>

### Transfused products and detection of red cell alloantibodies

All transfused red cell units were buffy-coat depleted, subsequently filtered through a leukocyte depletion filter and stored in SAGM for a maximum of 35 days.<sup>3</sup>

Patients in the Netherlands are routinely screened for red cell alloantibodies sometime during the 72 hours prior to red cell transfusion. Antibody screening involves an indirect antiglobulin test (column agglutination technology from BioRad, Cressier, Switzerland, or from Ortho Clinical Diagnostics, Raritan NJ, United States). According to Dutch transfusion guidelines, commercially available 3-cell screening panels are homozygous positive for D, C, c, E, e, K, Fy<sup>a</sup>, Fy<sup>b</sup>, Jk<sup>a</sup>, Jk<sup>b</sup>, M, S and s. The K antigen needs to be present minimally heterozygously; the presence of C<sup>w</sup>, Lu<sup>a</sup>, Wr<sup>a</sup>, and Kp<sup>a</sup> is not

mandatory.<sup>3</sup> If positive, screening was followed by subsequent antibody identification by an 11-cell panel using the same technique.

#### Data acquisition and statistical analyses

We gathered routinely stored data on red cell transfusion dates, dates and results of antibody screens (including antibody specificity), patients' date of birth, sex, and leukocyte counts from the hospitals' electronic laboratory information systems. In addition, we examined the medical charts of all cases and controls for the presence of various potential clinical risk variables during the alloimmunization risk period, including (hemato-)oncological diagnoses and treatment modalities. The associations of hematological malignancies and solid cancers with the development of red cell alloimmunization were evaluated using conditional logistic regression models. For crude relative risk (RR) calculations, we conditioned on the matched variables i.e. hospital and cumulative number of red cell units received. To control for additional confounders, we first identified covariates as possible confounders of a given determinant, based on their observed association with this determinant among the source population (i.e. the non-alloimmunized controls).<sup>4</sup> Such an association was defined as a  $\geq 3\%$  difference in covariate presence between controls exposed and controls not exposed to a given determinant. Covariates in the causal pathway between the determinant and the outcome were not considered as confounders.<sup>4</sup> Second, to address missing data on these confounders, we used multiple imputation (see below). Third, to also accurately control for confounders with rare prevalences, we estimated a probability score for each determinant using logistic regression with the potential confounders as predictors.<sup>5</sup> Finally, we evaluated the association of various types of malignancies and treatment modalities with red cell alloimmunization by entering the corresponding probability scores next to the matching variables into the logistic regression model with alloimmunization as the outcome.

We next assessed the association between (the degree of) leukopenia and red cell alloimmunization. Missing leukocyte counts were similarly multiply imputed (see below). Minimum leukocyte counts were subcategorized into 2-4, 1-2 and  $< 1 \times 10^9/L$  and referenced to normal counts ( $4-10 \times 10^9/L$ ). Since the likelihood that a low leukocyte count has been recorded at least once increases with the number of measurements and thus with the duration of hospitalization, we repeated this analysis limited to leukocyte counts measured within the week following the implicated transfusion.

A possible association between leukopenia (i.e. leukocyte counts  $< 4 \times 10^9/L$ ) and type of malignancy was evaluated using Pearson's chi-square test.

As we used an incidence-density sampling procedure for selecting controls,<sup>6</sup> we interpreted and present all odds ratios as RR with 95% confidence intervals (CI).

### Multiple imputation

To provide values for some missing predictor values, we performed multiple imputation creating five imputed datasets. Predictor variables included: alloimmunization status, age, gender, number of transfusions received, (types of) malignancies, chemo- and/or immunotherapy therapy, radiotherapy, use of immunosuppressant medication, (timing of) allogeneic and/or autologous stem cell transplant, graft versus host disease, (types of) infection, (duration of) fever, (duration of) ICU admittance, (types of) surgery, diabetes mellitus type 1, diabetes mellitus type 2, atherosclerosis, liver cirrhosis, renal insufficiency with a GFR  $\leq$  30 ml/min, dialysis, minimum leukocyte counts, maximum leukocyte counts, and maximum CRP values.

**Table S1. Specificity and distribution of first-formed red cell alloantibodies according to the presence and type of malignancy.**

| Alloantibody specificity                             | All patients, N (%) | Acute leukemia or mature lymphoma, N (%) | Carcinoma (%) |
|------------------------------------------------------|---------------------|------------------------------------------|---------------|
| anti-C                                               | 23 (4.0)            | 0 (0)                                    | 4 (3.1)       |
| anti-c                                               | 41 (7.2)            | 0 (0)                                    | 6 (4.7)       |
| anti-E                                               | 185 (32.3)          | 4 (20.0)                                 | 43 (33.3)     |
| anti-e                                               | 5 (0.9)             | 0 (0)                                    | 1 (0.8)       |
| anti-K                                               | 126 (22.0)          | 3 (15.0)                                 | 32 (24.8)     |
| anti-C <sup>w</sup>                                  | 19 (3.3)            | 1 (5.0)                                  | 4 (3.1)       |
| anti-Fy <sup>a</sup>                                 | 31 (5.4)            | 0 (0)                                    | 3 (2.3)       |
| anti-Fy <sup>b</sup>                                 | 5 (0.9)             | 0 (0)                                    | 1 (0.8)       |
| anti-Jk <sup>a</sup>                                 | 54 (9.4)            | 3 (15.0)                                 | 17 (13.2)     |
| anti-Jk <sup>b</sup>                                 | 7 (1.2)             | 2 (10.0)                                 | 0 (0)         |
| anti-Le <sup>a</sup>                                 | 7 (1.2)             | 2 (10.0)                                 | 2 (1.5)       |
| anti-Le <sup>b</sup>                                 | 3 (0.5)             | 0 (0)                                    | 1 (0.8)       |
| anti-Lu <sup>a</sup>                                 | 32 (5.6)            | 3 (15.0)                                 | 9 (7.0)       |
| anti-Lu <sup>b</sup>                                 | 0 (0)               | 0 (0)                                    | 0 (0)         |
| anti-M                                               | 22 (3.8)            | 2 (10.0)                                 | 3 (2.3)       |
| anti-N                                               | 1 (0.2)             | 0 (0)                                    | 0 (0)         |
| anti-S                                               | 12 (2.1)            | 0 (0)                                    | 3 (2.3)       |
| anti-s                                               | 0 (0)               | 0 (0)                                    | 0 (0)         |
| All antibodies                                       | 573                 | 20                                       | 129           |
| (possibly) natural occurring *                       | 268 (46.7)          | 12 (60.0)                                | 62 (48.1)     |
| generally not inducing hemolysis†                    | 55 (9.6)            | 5 (25.0)                                 | 12 (9.3)      |
| <i>N</i> patients                                    | 505                 | 19                                       | 112           |
| <i>N</i> patients with ≥ 2 first-time alloantibodies | 63 (12.5)           | 1 (5.3)                                  | 15 (13.4)     |

\* including: anti-E, anti-C<sup>w</sup>, anti-Le<sup>a</sup>, anti-Le<sup>b</sup>, anti-Lu<sup>a</sup>, and anti-M. † Including: anti-Lu<sup>a</sup>, anti-M and anti-N. The distribution of (possibly) natural occurring antibodies did not significantly differ between patients with acute leukemia or mature lymphoma as compared to the remaining of the study population, including patients with carcinoma (p=0.09, chi square test). In contrast, the frequency of non-hemolytic alloantibodies was higher in alloimmunized patients

with acute leukemia or mature lymphoma as compared to the remaining of the immunized population ( $p=0.03$ ), however, this did not affect conclusions presented in table 2 (data not shown).

**Table S2. Diagnoses, treatments and complications present during the alloimmunization risk period.**

| Characteristics                                                                | Cases (N=505) | Controls (N=1010) | Missing |
|--------------------------------------------------------------------------------|---------------|-------------------|---------|
| <b>Patient diagnoses</b>                                                       |               |                   |         |
| Diabetes mellitus (type 1 or 2)                                                | 97 (19.2)     | 183 (18.1)        | 1       |
| GFR ≤ 30 ml/min *                                                              | 56 (11.1)     | 149 (14.8)        |         |
| Atherosclerosis †                                                              | 198 (39.5)    | 314 (31.5)        | 17      |
| Chronic obstructive airway disease ‡                                           | 43 (8.5)      | 89 (9.0)          | 20      |
| Splenectomy (in past or during risk period)                                    | 1 (0.2)       | 19 (1.9)          |         |
| Liver cirrhosis                                                                | 13 (2.6)      | 24 (2.4)          | 2       |
| Haematological malignancy                                                      | 60 (11.9)     | 210 (20.8)        | 13      |
| Carcinoma                                                                      | 112 (22.3)    | 183 (18.2)        | 7       |
| <b>Treatment interventions</b>                                                 |               |                   |         |
| ICU admission                                                                  | 177 (36.5)    | 369 (35.0)        |         |
| Surgery                                                                        | 267 (52.9)    | 457 (45.2)        | 2       |
| Organ transplant                                                               | 4 (0.8)       | 23 (2.3)          |         |
| Dialysis (either chronic or acute) §                                           | 31 (6.1)      | 98 (9.7)          |         |
| Immunosuppressant medication                                                   | 154 (30.9)    | 423 (42.4)        | 20      |
| Chemotherapy ¶                                                                 | 66 (13.1)     | 224 (22.2)        | 6       |
| Radiotherapy                                                                   | 15 (3.0)      | 37 (3.7)          |         |
| Stem cell transplant (autologous or allogeneic, in past or during risk period) | 10 (2.0)      | 63 (6.2)          |         |
| <b>Treatment related complications</b>                                         |               |                   |         |
| Leukopenia **                                                                  | 102 (20.2)    | 313 (31.0)        |         |
| Graft versus host disease                                                      | 4 (0.8)       | 15 (1.5)          | 3       |
| Infections                                                                     |               |                   |         |
| bacterial                                                                      | 142 (29.3)    | 275 (28.7)        | 72      |
| viral                                                                          | 15 (3.0)      | 38 (3.8)          | 9       |
| fungal                                                                         | 12 (2.4)      | 44 (4.4)          | 13      |

Values are n (%), unless otherwise stated. Numbers of patients with unavailable data per variable are presented as missing. IQR = interquartile range.

\* glomerular filtration rate (GFR) below 30 ml/min during at least one week of the risk period (with GFR calculated using the Modification of Diet in Renal Diseases (MDRD) equation). † systemic or coronary atherosclerosis. ‡ chronic asthma bronchiale or chronic obstructive pulmonary disease. § hemodialysis, peritoneal dialysis, or continuous veno-venous hemofiltration needed for at least one day during the risk period. || medication under subcategory H02 (corticosteroids) or L04 (other immunosuppressants) within the World Health Organization's Anatomical Therapeutic Chemical (ATC) classification index. ¶ medication under subcategory L01 in the ATC classification index with the exception of agents in the subgroup L01XC (monoclonal antibodies) \*\* at least once measured leukocyte counts below lower limit of normal.

**Table S3. Categories and types of malignancies present during the alloimmunization risk period.**

| <b>Hematologic malignancies</b>   | <b>N</b> | <b>Carcinomas</b>              | <b>N</b> |
|-----------------------------------|----------|--------------------------------|----------|
| Diagnosed in <i>N</i> patients    | 270      | Diagnosed in <i>N</i> patients | 295      |
| Acute leukemia                    | 88       | Adrenal                        | 2        |
| myeloid (AML)                     | 76       | Bile tract                     | 2        |
| lymphoblastic (ALL) *             | 12       | Breast                         | 21       |
| Myelodysplastic syndrome          | 63       | Cervix, endometrial            | 14       |
| Multiple myeloma                  | 36       | Colorectal                     | 71       |
| Myeloproliferative neoplasm       | 38       | Duodenal, stomach              | 15       |
| Chronic lymphatic leukemia        | 12       | Esophagus                      | 11       |
| Lymphoma                          | 40       | Head and neck                  | 17       |
| (mature) B-cell lymphoma †        | 32       | Hepatic cell                   | 6        |
| T-cell lymphoma ‡                 | 7        | Lung §                         | 41       |
| undifferentiated                  | 1        | Ovarian                        | 19       |
|                                   |          | Pancreatic                     | 7        |
|                                   |          | Prostate                       | 21       |
|                                   |          | Renal cell                     | 20       |
|                                   |          | Squamous cell                  | 3        |
|                                   |          | Unknown primary origin         | 3        |
|                                   |          | Urothelial                     | 20       |
|                                   |          | Vaginal, vulvar                | 2        |
|                                   |          | Other                          | 1        |
| <b>Other</b>                      | <b>N</b> |                                |          |
| Diagnosed in <i>N</i> patients    | 43       |                                |          |
| Germ cell tumors                  | 4        |                                |          |
| Melanoma                          | 1        |                                |          |
| Neuro-endocrine tumors            | 3        |                                |          |
| Stromal and mesenchymal neoplasms | 35       |                                |          |

Cumulative numbers of types of malignancies per category may exceed the number of patients per category, as some patients were diagnosed with two malignant diseases.

\* acute lymphoblastic leukemia and acute lymphoblastic lymphoma. † of which: 6 patients with Burkitt lymphoma, 11 with diffuse large B cell lymphoma, 5 with follicular lymphoma, 1 with hairy cell lymphoma, 4 with Hodgkin lymphoma, 3 with mantle cell lymphoma, 1 with low-grade B cell lymphoma not otherwise specified, and 1 with lymphoplasmacytic lymphoma. ‡ of which: 3 patients with anaplastic T cell lymphoma, 1 with mycosis fungoides, and 3 with peripheral T cell lymphoma not otherwise specified. One patient was diagnosed with an undifferentiated mature lymphoma. § of which 37 patients with non-small cell lung carcinoma and 4 with small cell lung carcinoma. || of which: 2 patients with adenocarcinoma with unknown primary and 1 with squamous cell carcinoma with unknown primary.



**Table S4 Characteristics of 1,010 non-alloimmunized sampled controls during the alloimmunization risk period according to the presence and type of a malignancy.**

| Characteristics                                                       | Acute leukemia      |                        | Lymphoma            |                        | Carcinoma           |                        |
|-----------------------------------------------------------------------|---------------------|------------------------|---------------------|------------------------|---------------------|------------------------|
|                                                                       | present<br>(N=74)   | not present<br>(N=935) | Present<br>(N=35)   | not present<br>(N=973) | Present<br>(N=183)  | not present<br>(N=822) |
| <b>General</b>                                                        |                     |                        |                     |                        |                     |                        |
| Men                                                                   | 46 (62.2)           | 522 (55.8)             | 25 (71.4)           | 542 (55.7)             | 102 (55.7)          | 463 (56.3)             |
| Age in years (median, IQR)                                            | 55.1<br>(37.6-65.5) | 66.2<br>(52.5-75.8)    | 57.3<br>(34.3-67.1) | 65.5<br>(52.0-75.4)    | 67.7<br>(58.5-75.9) | 64.0<br>(49.3-74.9)    |
| Transfused in university hospitals                                    | 42 (56.8)           | 421 (45.0)             | 20 (57.1)           | 444 (45.6)             | 62 (33.9)           | 400 (48.9)             |
| Cumulative (lifetime) number of red cell units received (median, IQR) | 6.0<br>(3.0-12.5)   | 4<br>(2-8)             | 3.0 (2.0-7.0)       | 4.0 (2.0-8.0)          | 3.0 (2.0-6.0)       | 4.0 (2.0-8.0)          |
| Cumulative number of red cell units during risk period (median, IQR)  | 7 (4-11)            | 4 (2-8)                | 3 (2-6)             | 4 (2-8)                | 3 (2-6)             | 5 (3-9)                |
| Days transfused during risk period (median, IQR)                      | 3 (2-5)             | 2 (1-3)                | 2 (1-3)             | 2 (1-3)                | 2 (1-2)             | 2 (1-3)                |
| <b>Patient diagnoses</b>                                              |                     |                        |                     |                        |                     |                        |
| Diabetes mellitus type 1                                              | 0 (0)               | 7 (0.87)               | 1 (2.9)             | 6 (0.6)                | 1 (0.5)             | 6 (0.7)                |
| Diabetes mellitus type 2                                              | 7 (9.5)             | 169 (18.1)             | 2 (5.7)             | 173 (17.8)             | 31 (16.9)           | 145 (17.6)             |
| GFR ≤ 30 ml/min *                                                     | 3 (4.1)             | 146 (15.6)             | 3 (8.6)             | 146 (15.0)             | 21 (11.5)           | 128 (15.6)             |
| Atherosclerosis †                                                     | 7 (9.5)             | 307 (32.8)             | 1 (2.9)             | 312 (32.1)             | 44 (24.0)           | 269 (32.7)             |
| Chronic obstructive airway disease ‡                                  | 3 (4.1)             | 86 (9.2)               | 2 (5.7)             | 86 (8.8)               | 14 (7.7)            | 75 (9.1)               |
| Splenectomy (in past or during risk period)                           | 0 (0)               | 19 (2.0)               | 0 (0)               | 19 (2.0)               | 3 (1.6)             | 16 (1.9)               |
| Liver cirrhosis                                                       | 0 (0)               | 24 (2.6)               | 0 (0)               | 24 (2.5)               | 4 (2.2)             | 20 (2.4)               |
| <b>Malignancies</b>                                                   |                     |                        |                     |                        |                     |                        |
| acute leukemia                                                        | n.a.                | n.a.                   | 0 (0)               | 74 (7.6)               | 0 (0)               | 74 (9.0)               |
| myelodysplastic syndrome                                              | 3 (4.1)             | 43 (4.6)               | 1 (2.9)             | 45 (4.6)               | 0 (0)               | 46 (5.6)               |
| multiple myeloma                                                      | 0 (0)               | 26 (2.8)               | 0 (0)               | 26 (2.7)               | 0 (0)               | 26 (3.2)               |
| myeloproliferative neoplasm                                           | 0 (0)               | 29 (3.1)               | 0 (0)               | 29 (3.0)               | 0 (0)               | 29 (3.5)               |
| chronic lymphocytic leukemia                                          | 0 (0)               | 7 (0.8)                | 0 (0)               | 7 (0.7)                | 0 (0)               | 7 (0.9)                |
| Lymphoma                                                              | 0 (0)               | 35 (3.7)               | n.a.                | n.a.                   | 1 (0.5)             | 34 (4.1)               |
| Carcinoma                                                             | 0 (0)               | 183 (19.6)             | 1 (2.9)             | 182 (18.7)             | n.a.                | n.a.                   |
| <b>Treatment interventions</b>                                        |                     |                        |                     |                        |                     |                        |

|                                                                   |           |            |           |            |           |            |
|-------------------------------------------------------------------|-----------|------------|-----------|------------|-----------|------------|
| ICU admission                                                     | 5 (6.8)   | 364 (38.9) | 4 (11.4)  | 364 (37.4) | 51 (27.9) | 318 (38.7) |
| days at ICU (median, IQR)                                         | 0 (0-0)   | 0 (0-4.5)  | 0 (0-0)   | 0 (0-4)    | 0 (0-1)   | 0 (0-5)    |
| Surgery                                                           |           |            |           |            |           |            |
| thoracic including CABG                                           | 0 (0)     | 144 (15.4) | 0 (0)     | 143 (14.7) | 13 (7.1)  | 131 (15.9) |
| abdominal                                                         | 1 (1.4)   | 180 (19.3) | 0 (0)     | 181 (18.6) | 55 (30.1) | 126 (15.3) |
| back or spinal cord                                               | 0 (0)     | 11 (1.2)   | 0 (0)     | 11 (1.1)   | 1 (0.5)   | 10 (1.2)   |
| Organ transplant                                                  | 0 (0)     | 23 (2.5)   | 0 (0)     | 23 (2.4)   | 0 (0)     | 23 (2.8)   |
| Dialysis (either chronic or acute) §                              | 1 (1.4)   | 97 (10.4)  | 1 (2.9)   | 97 (10.0)  | 8 (4.4)   | 90 (10.9)  |
| Immunosuppressant medication                                      | 33 (44.6) | 389 (41.6) | 26 (74.3) | 395 (40.6) | 64 (35.0) | 358 (43.6) |
| Chemotherapy ¶¶                                                   | 64 (86.5) | 155 (16.6) | 28 (80.0) | 191 (19.6) | 39 (21.3) | 180 (21.9) |
| Radiotherapy                                                      | 0 (0)     | 39 (4.2)   | 4 (1.1)   | 35 (3.6)   | 21 (11.5) | 18 (2.2)   |
| HSCT (autologous or allogeneic, in past or during risk period) ** | 1 (1.4)   | 63 (6.7)   | 6 (17.1)  | 58 (6.0)   | 0 (0)     | 64 (7.8)   |
| <b>Treatment related complications</b>                            |           |            |           |            |           |            |
| Infections                                                        |           |            |           |            |           |            |
| severe bacterial                                                  | 4 (5.4)   | 165 (17.6) | 2 (5.7)   | 166 (17.1) | 33 (18.0) | 135 (16.4) |
| Gram-negative bacteremia ††                                       | 6 (8.1)   | 38 (4.1)   | 2 (2.9)   | 42 (4.3)   | 9 (4.9)   | 35 (4.3)   |
| disseminated viral ††                                             | 0 (0)     | 20 (2.1)   | 2 (2.9)   | 18 (1.8)   | 0 (0)     | 20 (2.4)   |
| Leukopenia §§                                                     | 56 (75.7) | 251 (26.8) | 28 (80.0) | 278 (28.6) | 41 (22.4) | 266 (32.3) |

Values are n (%), unless otherwise stated. IQR = interquartile range. n.a. = not applicable. The presence of acute leukemia, mature lymphoma, and carcinoma could not be determined for one, two, and five control patients, respectively.

\* glomerular filtration rate (GFR) below 30 ml/min during at least one week of the risk period (calculated according to the Modification of Diet in Renal Diseases (MDRD) equation). † systemic or coronary atherosclerosis. ‡ chronic asthma bronchiale or chronic obstructive pulmonary disease. § hemodialysis, peritoneal dialysis, or continuous veno-venous hemofiltration needed for at least one day during the risk period. || medication under subcategory H02 (corticosteroids) or L04 (other immunosuppressants) within the World Health Organization's Anatomical Therapeutic Chemical (ATC) classification index. ¶¶ medication under subcategory L01 in the ATC classification index with the exception of agents in the subgroup L01XC (monoclonal antibodies) \*\* hematopoietic stem cell transplant. †† abscesses, cardiac infections, infected foreign material, intra-abdominal infections, lower respiratory tract infections, meningitis, osteomyelitis, soft tissue infections, spondylodiscitis, upper urinary tract infections. †† viremia and varicella zoster infections. §§ at least once measured leucocyte counts below lower limit of normal.

**Table S5. Subset of variables identified as confounders per determinant for alloimmunization .**

| <b>Determinant</b>              | <b>Confounders</b>                                                                                                                                                                  |
|---------------------------------|-------------------------------------------------------------------------------------------------------------------------------------------------------------------------------------|
| all                             | Age, gender, (duration of) ICU admittance, thoracic surgery, atherosclerosis, GFR $\leq$ 30 ml/min, dialysis.                                                                       |
| acute leukemia                  | Idem as under 'all', plus:<br>abdominal surgery, DM2, COPD, MPN, lymphoma, carcinoma                                                                                                |
| Myelodysplastic syndrome        | Idem as under 'all', plus:<br>abdominal surgery, DM2.                                                                                                                               |
| Multiple myeloma                | Idem as under 'all', plus:<br>abdominal surgery, DM2, acute leukemia, lymphoma, carcinoma.                                                                                          |
| Myeloproliferative neoplasm     | Idem as under 'all', plus:<br>abdominal surgery, COPD, lymphoma, carcinoma.                                                                                                         |
| Chronic lymphocytic leukemia    | Idem as under 'all', plus:<br>abdominal surgery, DM2, COPD, acute leukemia, MDS, lymphoma, carcinoma.                                                                               |
| Lymphoma                        | Idem as under 'all', plus:<br>abdominal surgery, DM2, COPD, acute leukemia, MPN, carcinoma.                                                                                         |
| Carcinoma                       | Idem as under 'all', plus:<br>abdominal surgery, acute leukemia, MDS, MM, MPN, lymphoma.                                                                                            |
| Other malignancies              | Idem as under 'all', plus:<br>abdominal surgery, back or spinal surgery, splenectomy in past or during risk period, acute leukemia, MDS, lymphoma, carcinoma.                       |
| Chemo-/immunotherapy            | Idem as under 'all', plus:<br>abdominal surgery, DM2, COPD, immunosuppressant medication, acute leukemia, MDS, MM, MPN, lymphoma, carcinoma.                                        |
| Radiotherapy                    | Idem as under 'all', plus:<br>DM2, COPD, acute leukemia, MM, lymphoma, chemo-/immunotherapy, carcinoma.                                                                             |
| Autologous stem cell transplant | Idem as under 'all', plus:<br>abdominal surgery, DM2, COPD, acute leukemia, MM, MPN, lymphoma, carcinoma.                                                                           |
| Allogeneic stem cell transplant | Idem as under 'all', plus:<br>abdominal surgery, DM2, COPD, acute leukemia, MM, MPN, lymphoma, , carcinoma, (timing of previous) autologous HSCT.                                   |
| (degree of) leukopenia          | Idem as under 'all', plus:<br>abdominal surgery, DM2, COPD, immunosuppressant medication, acute leukemia, MDS, MM, carcinoma, chemo-/immunotherapy, radiotherapy, (timing of) HSCT. |

All determinants were associated with the variables listed under 'all'. In addition to these, several other potential confounders were identified per determinant.

Atherosclerosis = systemic or coronary atherosclerosis. GFR = glomerular filtration rate (GFR) below 30 ml/min during at least one week of the risk period (calculated according to the Modification of Diet in Renal Diseases (MDRD) equation. Dialysis = hemodialysis, peritoneal dialysis, or continuous veno-venous hemofiltration needed for at least one day during the risk period. DM2 = diabetes mellitus type 2. COPD = chronic asthma bronchiale or chronic obstructive pulmonary disease. MDS = myelodysplastic syndrome. MPN = myeloproliferative neoplasm. MM = multiple myeloma. Immunosuppressant medication = medication under subcategory H02 (corticosteroids) or L04 (other immunosuppressants) within the Anatomical Therapeutic Chemical (ATC) classification index. Chemo-/immunotherapy = medication under subcategory L01 within the ATC index plus antithymocyte globulin. HSCT = hematopoietic stem cell transplant.

**Table S6. Overview of imputed data per recorded variable.**

| Variable                                    | Type of variable (C / D) | Missing, N (%) | Variable                                        | Type of variable (C / D) | Missing, N (%) |
|---------------------------------------------|--------------------------|----------------|-------------------------------------------------|--------------------------|----------------|
| Age                                         | C                        | 0 (0)          | Multiple myeloma                                | C+D                      | 0 (0)          |
| Gender                                      | C                        | 0 (0)          | Myeloproliferative neoplasm                     | C+D                      | 4 (0.3)        |
| (duration of) ICU admittance                | C                        | 4 (0.3)        | Chronic lymphatic leukemia                      | D                        | 0 (0)          |
| Thoracic surgery                            | C                        | 0 (0)          | (Mature) lymphoma                               | C+D                      | 3 (0.2)        |
| Abdominal surgery                           | C                        | 0 (0)          | Carcinoma                                       | C+D                      | 7 (0.5)        |
| Surgery of back or spinal cord              | C                        | 0 (0)          | Chemo-/immunotherapy                            | C+D                      | 8 (0.5)        |
| Diabetes mellitus type 2                    | C                        | 1 (0.1)        | Radiotherapy                                    | C+D                      | 0 (0)          |
| Atherosclerosis                             | C                        | 17 (1.1)       | Autologous HSCT (in past or during risk period) | C+D                      | 0 (0)          |
| COPD                                        | C                        | 20 (1.3)       | Allogeneic HSCT (in past or during risk period) | C+D                      | 0 (0)          |
| GFR ≤ 30 ml/min                             | C                        | 2 (0.1)        | Use of immunosuppressant medication             | C+D                      | 20 (1.3)       |
| Dialysis                                    | C                        | 0 (0)          | Minimum leukocyte counts                        | D                        | 41 (2.7)       |
| Splenectomy (in past or during risk period) | C                        | 0 (0)          |                                                 |                          |                |
| Acute leukemia                              | C+D                      | 1 (0.1)        |                                                 |                          |                |
| Myelodysplastic syndrome                    | C+D                      | 3 (0.2)        |                                                 |                          |                |

Only missing data on variables assessed as determinants (D) of alloimmunization and potential confounders (C) of these determinants (table S3) are presented.

Atherosclerosis = systemic or coronary atherosclerosis. COPD = chronic asthma bronchiale or chronic obstructive pulmonary disease. GFR ≤ 30 ml/min = glomerular filtration rate below 30 ml/min during at least one week of the risk period (calculated according to the Modification of Diet in Renal Diseases (MDRD) equation). Dialysis = hemodialysis, peritoneal dialysis, or continuous veno-venous hemofiltration needed for at least one day during the risk period. Chemo-/immunotherapy = medication under subcategory L01 within the ATC index plus antithymocyte globulin. HSCT = hematopoietic stem cell transplant. Immunosuppressant medication = medication under subcategory H02 (corticosteroids) or L04 (other immunosuppressants) within the ATC index.

**Table S7. Association between non-hematological malignancies and red cell alloimmunization according to specific type of malignancies.**

|                         | <b>Cases<br/>(N=505)</b> | <b>Controls<br/>(N=1,010)</b> | <b>RR (CI) *</b> | <b>Adjusted RR (CI) †</b> | <b>Excluded from<br/>analysis</b> |
|-------------------------|--------------------------|-------------------------------|------------------|---------------------------|-----------------------------------|
| <b>Carcinoma</b>        | 112 (22.3)               | 183 (18.2)                    | 1.30 (0.99-1.70) | 1.01 (0.75-1.37)          | 7                                 |
| Breast                  | 8 (1.6)                  | 13 (1.3)                      | 1.30 (0.53-3.18) | 1.02 (0.40-2.58)          | 0                                 |
| Colorectal              | 24 (4.8)                 | 47 (4.7)                      | 1.08 (0.64-1.81) | 0.86 (0.49-1.49)          | 0                                 |
| Lung                    | 17 (3.4)                 | 24 (2.4)                      | 1.47 (0.77-2.78) | 1.22 (0.63-2.37)          | 0                                 |
| Prostate                | 4 (0.8)                  | 16 (1.6)                      | 0.53 (0.17-1.61) | 0.49 (0.16-1.53)          | 0                                 |
| Renal cell              | 6 (1.2)                  | 14 (1.4)                      | 0.91 (0.35-2.41) | 0.83 (0.31-2.23)          | 0                                 |
| Urothelial              | 7 (1.4)                  | 13 (1.3)                      | 1.11 (0.44-2.84) | 1.09 (0.41-2.89)          | 0                                 |
| <b>Other</b>            | 12 (2.4)                 | 31 (3.1)                      | 0.77 (0.39-1.53) | 0.83 (0.41-1.68)          | 1                                 |
| Stromal and mesenchymal | 9 (1.8)                  | 26 (2.6)                      | 0.69 (0.31-1.50) | 0.74 (0.33-1.65)          | 1                                 |

Values are n (%). Only subtypes of solid tumors with at least 20 patients diagnosed are presented. \* Adjusted for the matched variables: number of transfused red cell units and hospital. † Additionally adjusted for other potential confounders (for details, see appendix p 10-11).

**Table S8. Chemotherapy and red cell alloimmunization risks.**

| Type of malignancy                 | Chemotherapy | Cases<br>(N=505) | Controls<br>(N=1,010) | RR (CI) *        | Adjusted RR (CI) † |
|------------------------------------|--------------|------------------|-----------------------|------------------|--------------------|
| <b>Multiple myeloma</b>            |              |                  |                       |                  |                    |
| -                                  |              | 493              | 981                   | <i>ref</i>       | <i>ref</i>         |
| +                                  | -            | 4                | 7                     | 1.14 (0.32-4.06) | 1.19 (0.33-4.34)   |
| +                                  | +            | 6                | 18                    | 0.67 (0.26-1.72) | 0.70 (0.27-1.82)   |
| <b>Myeloproliferative neoplasm</b> |              |                  |                       |                  |                    |
| -                                  |              | 494              | 977                   | <i>ref</i>       | <i>ref</i>         |
| +                                  | -            | 3                | 13                    | 0.46 (0.13-1.63) | 0.48 (0.13-1.73)   |
| +                                  | +            | 6                | 16                    | 0.75 (0.29-1.95) | 0.79 (0.30-2.09)   |
| <b>Chronic lymphatic leukemia</b>  |              |                  |                       |                  |                    |
| -                                  |              | 499              | 999                   | <i>ref</i>       | <i>ref</i>         |
| +                                  | -            | 1                | 3                     | 0.49 (0.05-4.85) | 0.67 (0.07-6.47)   |
| +                                  | +            | 3                | 4                     | 1.27 (0.27-6.01) | 1.53 (0.33-7.11)   |

+ = present; - = absent. Only numbers of patients for whom the presence or absence of a given malignancy and the use of chemotherapy during the alloimmunization risk period could be determined are presented. \* Adjusted for the matched variables: number of transfused red cell units and hospital. † Additionally adjusted for other potential confounders (for details, see appendix p 10-11).

**Table S9. Types of chemotherapeutic agents per drug category with their associated sample numbers.**

| <b>Drug category and name</b> | <b>Number of patients</b> | <b>Drug category and name</b>    | <b>Number of patients</b> |
|-------------------------------|---------------------------|----------------------------------|---------------------------|
| <b>Alkaloid</b>               |                           | <b>Hypomethylating agents</b>    |                           |
| Vincristine                   | 31                        | Azacitidine                      | 7                         |
| Vinorelbine                   | 1                         | Decitabine                       | 1                         |
| <b>Alkylating agents</b>      |                           | <b>Platinum-based agents</b>     |                           |
| Busulfan                      | 10                        | Carboplatin                      | 20                        |
| Carmustine                    | 3                         | Cisplatin                        | 41                        |
| Chlorambucil                  | 4                         | Oxaliplatin                      | 5                         |
| Cyclophosphamide              | 34                        | <b>Proteinkinase inhibitors</b>  |                           |
| Ifosfamide                    | 8                         | Dasatinib                        | 4                         |
| Lomustine                     | 2                         | Imatinib                         | 6                         |
| Melphalam                     | 15                        | Nilotinib                        | 1                         |
| Thiotepa                      | 1                         | Sunitinib                        | 1                         |
| <b>Antimetabolites</b>        |                           | <b>Other</b>                     |                           |
| Capecitabine                  | 12                        | Amsacrine                        | 11                        |
| Clofarabine                   | 10                        | (peg)-asparaginase               | 9                         |
| Cytarabine                    | 80                        | Bortezomib                       | 8                         |
| Fludarabine                   | 23                        | Hydroxycarbamide                 | 21                        |
| Fluorouracil                  | 2                         | Mitotane                         | 1                         |
| Gemcitabine                   | 16                        | Procarbazine                     | 1                         |
| Mercaptopurine                | 8                         | Tretinoin                        | 4                         |
| Methotrexate                  | 28                        | <b>Taxane</b>                    |                           |
| Pemetrexed                    | 9                         | Docetaxel                        | 7                         |
| Thioguanin                    | 4                         | Paclitaxel                       | 9                         |
| <b>Anthracyclines</b>         |                           | <b>Topo-isomerase inhibitors</b> |                           |
| Daunorubicin                  | 21                        | Etoposide                        | 39                        |
| Doxorubicin                   | 26                        | Irinotecan                       | 1                         |
| Epirubicin                    | 5                         |                                  |                           |
| Idarubicin                    | 28                        |                                  |                           |
| Mitoxantrone                  | 8                         |                                  |                           |



## References

1. TRIX. TRIX. Dutch transfusion register for irregular antibodies. Further information at: <http://www.sanquin.nl/producten-diensten/diagnostiek/trix>. 2016.
2. Evers D, Middelburg RA, de Haas M, et al. Red cell alloimmunisation in relation to antigens' exposure and their immunogenicity: a cohort study. *Lancet Haematology*. 2016;3(6):e284-292
3. CBO Blood Transfusion Guideline 2011. English version accessible at: <http://www.sanquin.nl/repository/documenten/en/prod-en-dienst/287294/blood-transfusion-guideline.pdf>.
4. Hernan MA, Hernandez-Diaz S, Werler MM, Mitchell AA. Causal knowledge as a prerequisite for confounding evaluation: an application to birth defects epidemiology. *Am J Epidemiol*. 2002;155(2):176-184.
5. Brookhart MA, Wyss R, Layton JB, Sturmer T. Propensity score methods for confounding control in nonexperimental research. *Circ Cardiovasc Qual Outcomes*. 2013;6(5):604-611.
6. Rothman Kenneth J. *Modern Epidemiology*. Philadelphia, Lippincott Williams & Wilkins; 2008.
