# Supplementary material
Source: PubMed Central journal article supplement (PMC5210232)
Supplement: 2016_152074-Disclosures_and_Contributions.pdf [file 2016_152074-Disclosures_and_Contributions.pdf]

Haematologica  
HAEMATOL/2016/152074  
Version 3

Treatments for hematological malignancies in contrast to those for solid cancers are associated with reduced red cell alloimmunization.

Dorothea Evers, Jaap Jan Zwaginga, Janneke Tijmensen, Rutger A. Middelburg, Masja de Haas, Karen M.K. de Vooght, Daan van de Kerkhof, Otto Visser, Nathalie C.V. Péquériaux, Francisca Hudig, and Johanna G. van der Bom

Disclosures: The authors declare that they have no conflict of interest relevant to the work presented in this manuscript.

Contributions: JJZ and JGB designed the study. DE and JT collected the data. DE, JJZ, RAM, MH and JGB analyzed and interpreted the data. DE, JJZ, MH, and JGB wrote the manuscript. All other authors revised and approved the final manuscript.
